# Supplementary material for: Chirurgische Nadeln in Orthopädie und Unfallchirurgie
Source: Springer Nature journal article supplement (doi:10.1007/s00064-021-00734-7), 2021-09-16
Supplement: MOESM1 [file 19668542]

## Äquivalenztabelle chirurgischer Nadeln in Orthopädie und Unfallchirurgie

Die Nadeln wurden nach Internetrecherche aus den uns zugängigen Unterlagen der Hersteller zusammengestellt. Für Vollständigkeit und Exaktheit kann keine Garantie übernommen werden. Für Korrekturhinweise sind wir dankbar.

Erklärung der Symbole:

|                                              |                                                                                     |
|----------------------------------------------|-------------------------------------------------------------------------------------|
| Kegelspitze                                  |    |
| Kegelspitze, abgeflacht                      |    |
| Spatelnadel                                  |    |
| Schneidend, revers                           |    |
| konisch, stumpf                              |    |
| Rundkörper schneidende Spitze, revers        |    |
| Rundkörper schneidende Spitze, konventionell |    |
| Schneidend Spezial spezial                   |   |
| Schneidend Spezial spezialrevers             |  |
| Rundkörper, kurze schneidende Spitze         |  |
| scharf, revers, Mikrospitze                  |  |
| stumpf Rundnadel                             |  |

Verwendete Literatur/Internetrecherche:

1. B.Braun B.Braun Nahtmaterial Gut zu wissen. B24601 1218/2/5: [www.aesculap.de](http://www.aesculap.de)
2. Dunn DL, Phillips J (2007) Wound closure manual. Ethicon, Somerville, New Jersey
3. Ethicon (2020) Nadel- und Nahtmaterialübersicht 152682-201026-DACH\_J11B247. <https://www.ethicon.com/emea/epc/search/platform/wound%20closure?lang=de-de>
4. Ethicon (2021) Schon Gewusst. J11B061V19: B. BRAUN NAHTMATERIAL <https://www.bbraun.de> › bbraun › AEM2015 › de-de
5. SERAG-Wiessner. Nahtmaterial-Fibel Materialkunde Naht- und Nahtknüpftechnik. Naila: 2017. 1 p.

Zusätzlich wurden die Bestellkataloge der Firmen ausgewertet.
